# Supplementary material
Source: PubMed Central journal article supplement (PMC5339847)
Supplement: cr2016145x3.pdf [file cr2016145x3.pdf]

**Supplementary information, Table S1A.** Stable transmission of RS(tRNA)<sub>4x</sub> transgene from founder F0-1 to subsequent generations in mice.

| Generation          | No. of mice | No. of positive | Percentage (%) |
|---------------------|-------------|-----------------|----------------|
| <b>F1 (F0-1×WT)</b> | <b>3</b>    | <b>1</b>        | <b>33.3</b>    |
| <b>F2 (F1×WT)</b>   | <b>35</b>   | <b>18</b>       | <b>51.4</b>    |
| <b>F3 (F2×WT)</b>   | <b>17</b>   | <b>7</b>        | <b>41.2</b>    |

**Supplementary information, Table S1B.** Calculation of RS(tRNA)<sub>4x</sub> gene copy number in transgenic mice.

| Sample | N <sub>RS(tRNA)<sub>4x</sub></sub> | N <sub>GAPDH</sub> | N <sub>RS(tRNA)<sub>4x</sub></sub> /N <sub>GAPDH</sub> | Copy number | Average |
|--------|------------------------------------|--------------------|--------------------------------------------------------|-------------|---------|
| NO.1   | 463058.648619                      | 28846.956524       | 16.1                                                   | 16          | 15      |
| NO.2   | 243827.676404                      | 17507.642370       | 13.9                                                   | 14          |         |
| NO.3   | 11096576.205261                    | 812307.257330      | 13.6                                                   | 14          |         |
| WT     | 21347.842991                       | 833.379858         | 0.04                                                   | 0           |         |
